# Supplementary material for: Dynamic 15N{1H} NOE measurements: a tool for studying protein dynamics
Source: PubMed Central journal article supplement (PMC7701129; doi:10.1007/s10858-020-00346-6), 2020-09-12

## Supplementary material

### Dynamic $^{15}\text{N}\{^1\text{H}\}$ NOE measurements – a tool for studying protein dynamics

Vladlena Kharchenko <sup>1</sup>, Michal Nowakowski <sup>1,2</sup>, Mariusz Jaremko <sup>1</sup>, Andrzej Ejchart <sup>3</sup>,  
Łukasz Jaremko <sup>1\*</sup>

1. Division of Biological and Environmental Sciences and Engineering (BESE), King Abdullah University of Science and Technology (KAUST), Thuwal, 23955-6900, Saudi Arabia.
2. Faculty of Chemistry, Biological and Chemical Research Centre, University of Warsaw, Żwirki i Wigury 101, 02-089, Warszawa, Poland.
3. Institute of Biochemistry and Biophysics, Polish Academy of Sciences, Pawlinskiego 5A, 02-106, Warszawa, Poland.

\*e-mail: lukasz.jaremko@kaust.edu.sa

#### Table of Contents

|                                               |                                                                            |         |
|-----------------------------------------------|----------------------------------------------------------------------------|---------|
| Table S1                                      | Minimal values of $D_{sat}$                                                | p. 2    |
| Figure S1                                     | The $dR_1$ propagation in the processing of DNOE (16.4 T)                  | p. 2    |
| Figure S2                                     | The $dR_1$ propagation in the processing of DNOE (22.3 T)                  | p. 2    |
| Figure S3                                     | NOE errors, $d\varepsilon$ , in different data processing of DNOE (16.4 T) | p. 3    |
| Figure S4                                     | The $dR_1$ errors in different data processing of DNOE (16.4 T)            | p. 3    |
| Figure S5                                     | NOE errors, $d\varepsilon$ , in different data processing of DNOE (22.3 T) | p. 4    |
| Figure S6                                     | The $dR_1$ errors in different data processing of DNOE (22.3 T)            | p. 4    |
| Table S2                                      | Numerical results of different data processing of DNOE (22.3 T)            | pp. 5-8 |
| Determination of <i>signal-to-noise</i> ratio |                                                                            | p. 8    |
| Table S3                                      | Basic delays used in NOE and $R_1$ measurements                            | p. 9    |
| Figure S7                                     | Correction of the $H_N$ saturation period $D_{sat}$ (22.3 T)               | p. 10   |

**Table S1**

The largest,  $R_1(\text{D21})$ , and the smallest,  $R_1(\text{G76})$ ,  $^{15}\text{N}$  longitudinal relaxation rates in ubiquitin. Minimal values of  $D_{\text{sat}}$  calculated from the condition  $\exp(-D_{\text{sat}} \cdot R_{1\text{N}}) = 0.02$ .

| $B_0$ [T] | $R_1(\text{G76})$ [ $\text{s}^{-1}$ ] | $R_1(\text{D21})$ [ $\text{s}^{-1}$ ] | $D_{\text{sat}}(\text{G76})$ [s] | $D_{\text{sat}}(\text{D21})$ [s] |
|-----------|---------------------------------------|---------------------------------------|----------------------------------|----------------------------------|
| 16.4      | 0.80                                  | 1.98                                  | 4.9                              | 2.0                              |
| 18.8      | 0.80                                  | 1.73                                  | 4.9                              | 2.3                              |
| 22.3      | 0.85                                  | 1.61                                  | 4.6                              | 2.4                              |

**Figure S1**

Visualization of the influence of  $dR_1$  propagation in the sequential processing of  $R_1$  and DNOE data at 16.4 T. Standard errors,  $d\varepsilon$ , neglecting inaccuracies in  $R_1$  determination (yellow squares) or accounting for  $dR_1$  propagation (blue triangles). The differences are visible for G75 ( $\varepsilon = -0.248$ ) and G76 ( $\varepsilon = -0.812$ ).

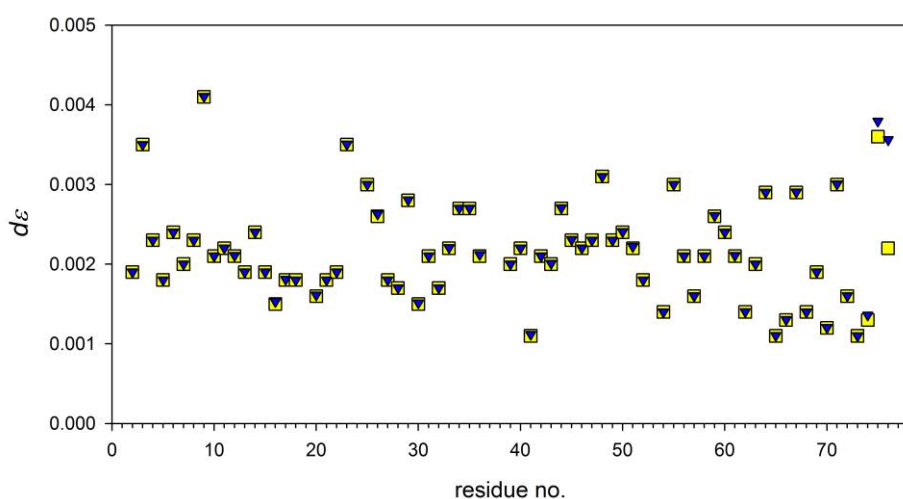**Figure S2**

Visualization of the influence of  $dR_1$  propagation in the sequential processing of  $R_1$  and DNOE data at 22.3 T. Standard errors,  $d\varepsilon$ , neglecting inaccuracies in  $R_1$  determination (yellow squares) or accounting for  $dR_1$  propagation (blue triangles). The differences are visible for G75 ( $\varepsilon = 0.142$ ) and G76 ( $\varepsilon = -0.246$ ).

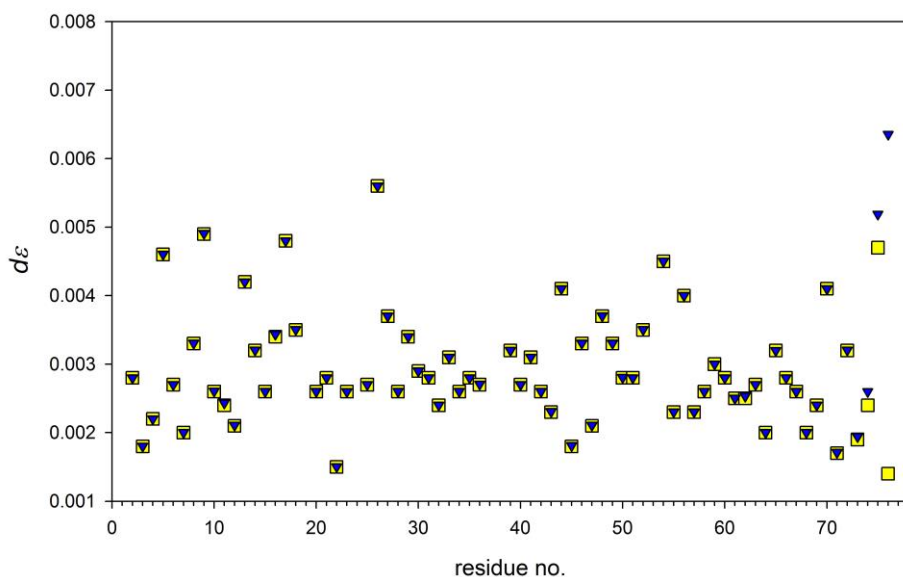

**Figure S3**

Comparison of NOE errors,  $d\varepsilon$ , determined by different methods of data processing of DNOE data measured at 16.4 T: sequential task with  $dR_1$  propagation (brown circles), simultaneous task (orange triangles), stand-alone DNOE data (light green squares).

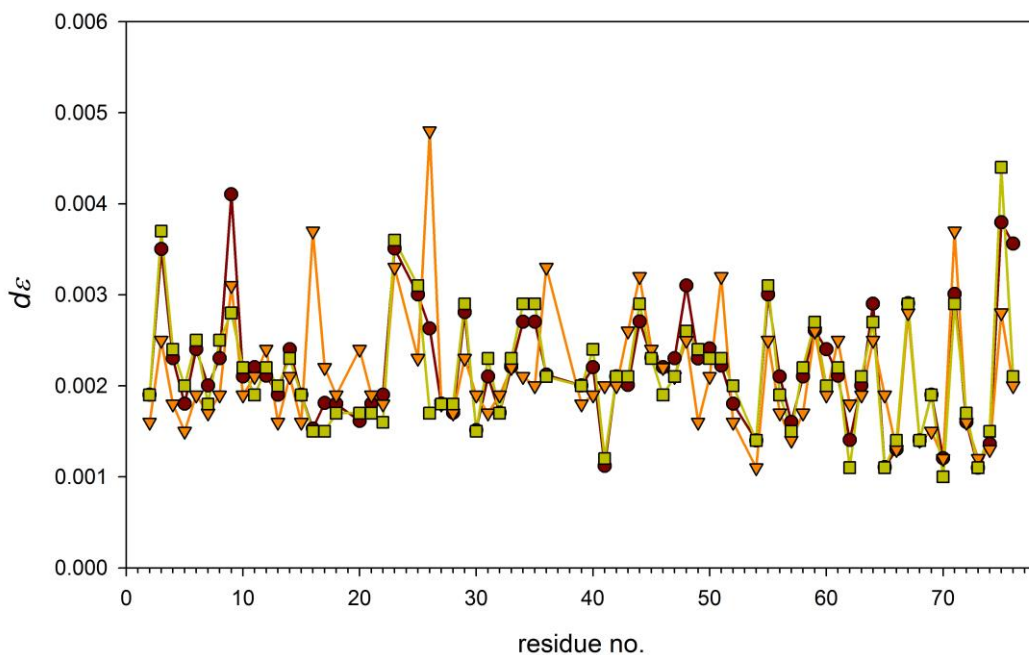

**Figure S4**

Comparison of  $R_1$  errors,  $dR_1$ , determined in different methods of data processing of DNOE data measured at 16.4 T: independent  $R_1$  measurement delivering results to the sequential task (brown circles), simultaneous task (orange triangles), stand-alone DNOE data (light green squares).

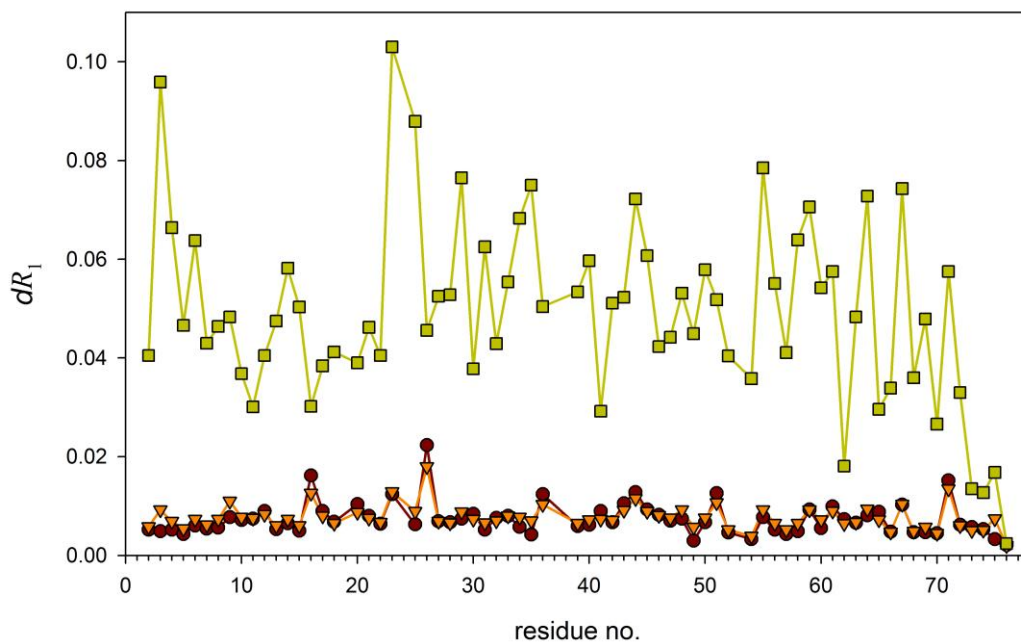

**Figure S5**

Comparison of NOE errors,  $d\varepsilon$ , determined by different methods of data processing of DNOE data measured at 22.3 T: sequential task with  $dR_1$  propagation (brown circles), simultaneous task (orange triangles), stand-alone DNOE data (light green squares).

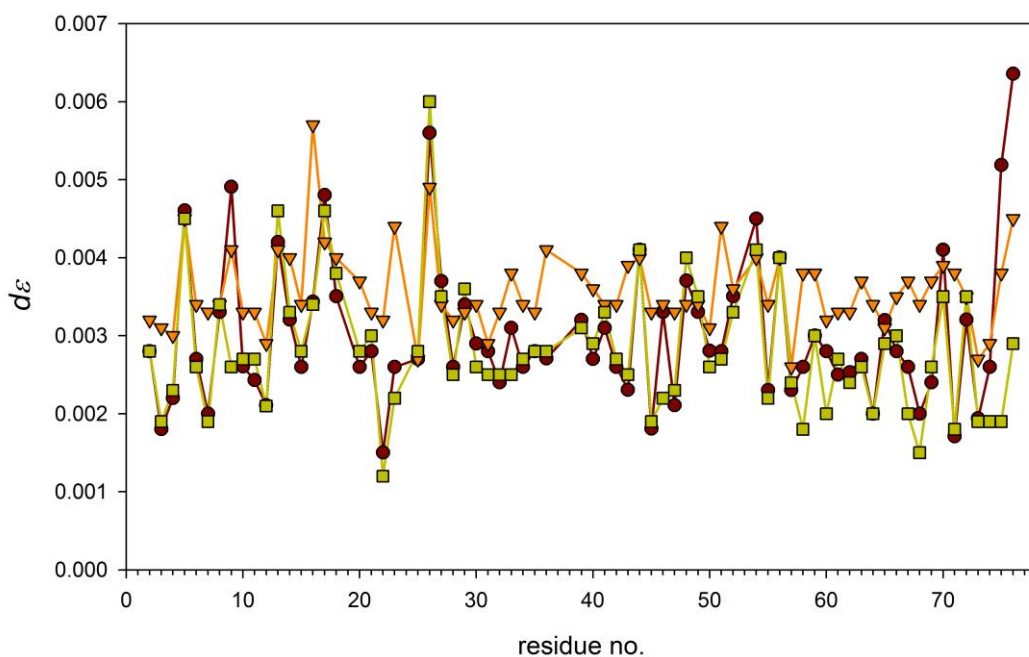

**Figure S6**

Comparison of  $R_1$  errors,  $dR_1$ , determined in different methods of data processing of DNOE data measured at 22.3 T: independent  $R_1$  measurement delivering results to the sequential task (brown circles), simultaneous task (orange triangles), stand-alone DNOE data (light green squares).

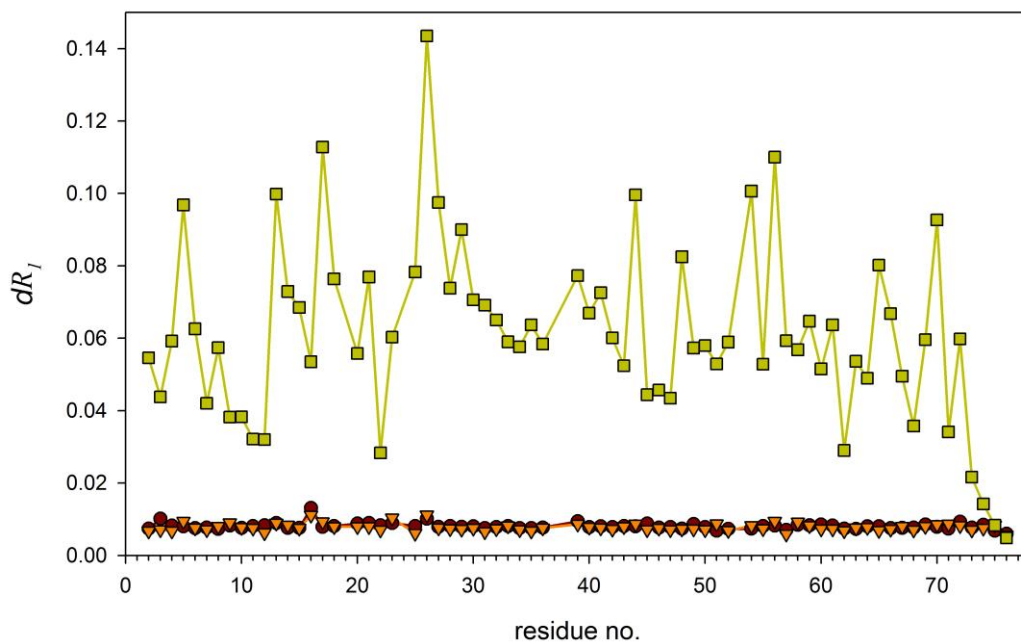

**Table S2**

Results of three different data processing of dynamic NOE at 22.3 T: sequential determination of  $R_1$  from the  $R_1$  dedicated data followed by the  $\varepsilon$  determination from DNOE measurement utilizing previously determined  $R_1$  values, simultaneous use of DNOE and  $R_1$  data in a single computational task, and stand-alone DNOE data used for the determination of both,  $R_1$  and  $\varepsilon$  values.

**Part A:**  $\varepsilon$  values and their standard deviations; sequential  $d\varepsilon$  account for  $dR_1$  propagation

| $\varepsilon$ | Seq. $R_1$ and DNOE |       | Sim. $R_1$ and DNOE |       | Stand-alone DNOE data |       |
|---------------|---------------------|-------|---------------------|-------|-----------------------|-------|
| Q2            | 0.807               | 0.003 | 0.807               | 0.003 | 0.808                 | 0.003 |
| I3            | 0.831               | 0.002 | 0.831               | 0.003 | 0.831                 | 0.002 |
| F4            | 0.848               | 0.002 | 0.848               | 0.003 | 0.848                 | 0.002 |
| V5            | 0.818               | 0.005 | 0.818               | 0.005 | 0.819                 | 0.005 |
| K6            | 0.834               | 0.003 | 0.834               | 0.003 | 0.834                 | 0.003 |
| T7            | 0.817               | 0.002 | 0.817               | 0.003 | 0.818                 | 0.002 |
| L8            | 0.748               | 0.003 | 0.748               | 0.003 | 0.749                 | 0.003 |
| T9            | 0.701               | 0.005 | 0.701               | 0.004 | 0.704                 | 0.003 |
| G10           | 0.712               | 0.003 | 0.713               | 0.003 | 0.713                 | 0.003 |
| K11           | 0.677               | 0.002 | 0.677               | 0.003 | 0.677                 | 0.003 |
| T12           | 0.756               | 0.002 | 0.756               | 0.003 | 0.756                 | 0.002 |
| I13           | 0.825               | 0.004 | 0.825               | 0.004 | 0.825                 | 0.005 |
| T14           | 0.829               | 0.003 | 0.830               | 0.004 | 0.830                 | 0.003 |
| L15           | 0.840               | 0.003 | 0.840               | 0.003 | 0.840                 | 0.003 |
| E16           | 0.799               | 0.003 | 0.799               | 0.006 | 0.797                 | 0.003 |
| V17           | 0.828               | 0.005 | 0.828               | 0.004 | 0.829                 | 0.005 |
| E18           | 0.831               | 0.004 | 0.831               | 0.004 | 0.831                 | 0.004 |
| S20           | 0.810               | 0.003 | 0.810               | 0.004 | 0.811                 | 0.003 |
| D21           | 0.848               | 0.003 | 0.848               | 0.003 | 0.847                 | 0.003 |
| T22           | 0.833               | 0.002 | 0.833               | 0.003 | 0.833                 | 0.001 |
| I23           | 0.844               | 0.003 | 0.844               | 0.004 | 0.844                 | 0.002 |
| N25           | 0.854               | 0.003 | 0.854               | 0.003 | 0.854                 | 0.003 |
| V26           | 0.843               | 0.006 | 0.843               | 0.005 | 0.843                 | 0.006 |
| K27           | 0.844               | 0.004 | 0.844               | 0.003 | 0.844                 | 0.004 |
| A28           | 0.854               | 0.003 | 0.854               | 0.003 | 0.855                 | 0.003 |
| K29           | 0.841               | 0.003 | 0.841               | 0.003 | 0.842                 | 0.004 |
| I30           | 0.844               | 0.003 | 0.844               | 0.003 | 0.845                 | 0.003 |
| Q31           | 0.843               | 0.003 | 0.843               | 0.003 | 0.844                 | 0.003 |
| D32           | 0.844               | 0.002 | 0.844               | 0.003 | 0.844                 | 0.003 |
| K33           | 0.823               | 0.003 | 0.823               | 0.004 | 0.824                 | 0.003 |
| E34           | 0.825               | 0.003 | 0.825               | 0.003 | 0.825                 | 0.003 |
| G35           | 0.834               | 0.003 | 0.834               | 0.003 | 0.835                 | 0.003 |
| I36           | 0.836               | 0.003 | 0.836               | 0.004 | 0.836                 | 0.003 |
| D39           | 0.829               | 0.003 | 0.829               | 0.004 | 0.830                 | 0.003 |
| Q40           | 0.832               | 0.003 | 0.832               | 0.004 | 0.832                 | 0.003 |
| Q41           | 0.820               | 0.003 | 0.820               | 0.003 | 0.821                 | 0.003 |
| R42           | 0.830               | 0.003 | 0.830               | 0.003 | 0.830                 | 0.003 |
| L43           | 0.830               | 0.002 | 0.830               | 0.004 | 0.830                 | 0.003 |
| I44           | 0.835               | 0.004 | 0.835               | 0.004 | 0.836                 | 0.004 |
| F45           | 0.840               | 0.002 | 0.840               | 0.003 | 0.840                 | 0.002 |

|     |        |       |        |       |        |       |
|-----|--------|-------|--------|-------|--------|-------|
| A46 | 0.792  | 0.003 | 0.792  | 0.003 | 0.794  | 0.002 |
| G47 | 0.801  | 0.002 | 0.801  | 0.003 | 0.801  | 0.002 |
| K48 | 0.821  | 0.004 | 0.821  | 0.003 | 0.821  | 0.004 |
| Q49 | 0.768  | 0.003 | 0.768  | 0.003 | 0.769  | 0.004 |
| L50 | 0.813  | 0.003 | 0.813  | 0.003 | 0.813  | 0.003 |
| E51 | 0.814  | 0.003 | 0.814  | 0.004 | 0.814  | 0.003 |
| D52 | 0.798  | 0.004 | 0.798  | 0.004 | 0.799  | 0.003 |
| R54 | 0.833  | 0.005 | 0.833  | 0.004 | 0.834  | 0.004 |
| T55 | 0.831  | 0.002 | 0.831  | 0.003 | 0.832  | 0.002 |
| L56 | 0.841  | 0.004 | 0.841  | 0.004 | 0.842  | 0.004 |
| S57 | 0.838  | 0.002 | 0.838  | 0.003 | 0.838  | 0.002 |
| D58 | 0.853  | 0.003 | 0.853  | 0.004 | 0.853  | 0.002 |
| Y59 | 0.837  | 0.003 | 0.837  | 0.004 | 0.836  | 0.003 |
| N60 | 0.828  | 0.003 | 0.828  | 0.003 | 0.829  | 0.002 |
| I61 | 0.836  | 0.003 | 0.836  | 0.003 | 0.836  | 0.003 |
| Q62 | 0.687  | 0.003 | 0.687  | 0.003 | 0.688  | 0.002 |
| K63 | 0.816  | 0.003 | 0.816  | 0.004 | 0.816  | 0.003 |
| E64 | 0.833  | 0.002 | 0.833  | 0.003 | 0.833  | 0.002 |
| S65 | 0.847  | 0.003 | 0.847  | 0.003 | 0.847  | 0.003 |
| T66 | 0.838  | 0.003 | 0.838  | 0.004 | 0.838  | 0.003 |
| L67 | 0.836  | 0.003 | 0.836  | 0.004 | 0.837  | 0.002 |
| H68 | 0.838  | 0.002 | 0.838  | 0.003 | 0.839  | 0.002 |
| L69 | 0.835  | 0.002 | 0.835  | 0.004 | 0.835  | 0.003 |
| V70 | 0.837  | 0.004 | 0.837  | 0.004 | 0.838  | 0.004 |
| L71 | 0.791  | 0.002 | 0.791  | 0.004 | 0.791  | 0.002 |
| R72 | 0.767  | 0.003 | 0.767  | 0.004 | 0.766  | 0.004 |
| L73 | 0.601  | 0.002 | 0.602  | 0.003 | 0.602  | 0.002 |
| R74 | 0.417  | 0.003 | 0.417  | 0.003 | 0.420  | 0.002 |
| G75 | 0.127  | 0.005 | 0.127  | 0.004 | 0.139  | 0.002 |
| G76 | -0.257 | 0.006 | -0.259 | 0.005 | -0.258 | 0.003 |

**Part B:**  $R_1$  values and their standard deviations

| $R_1$ [ $s^{-1}$ ] | Seq. $R_1$ and DNOE |       | Sim. $R_1$ and DNOE |       | Stand-alone DNOE data |       |
|--------------------|---------------------|-------|---------------------|-------|-----------------------|-------|
| Q2                 | 1.405               | 0.007 | 1.408               | 0.007 | 1.462                 | 0.055 |
| I3                 | 1.504               | 0.010 | 1.534               | 0.007 | 1.540                 | 0.044 |
| F4                 | 1.538               | 0.008 | 1.537               | 0.007 | 1.568                 | 0.059 |
| V5                 | 1.409               | 0.008 | 1.420               | 0.009 | 1.533                 | 0.097 |
| K6                 | 1.511               | 0.008 | 1.514               | 0.008 | 1.593                 | 0.063 |
| T7                 | 1.490               | 0.008 | 1.485               | 0.007 | 1.553                 | 0.042 |
| L8                 | 1.545               | 0.007 | 1.546               | 0.008 | 1.600                 | 0.057 |
| T9                 | 1.433               | 0.008 | 1.427               | 0.009 | 1.614                 | 0.038 |
| G10                | 1.491               | 0.008 | 1.503               | 0.008 | 1.525                 | 0.038 |
| K11                | 1.442               | 0.008 | 1.450               | 0.008 | 1.427                 | 0.032 |
| T12                | 1.404               | 0.008 | 1.401               | 0.006 | 1.447                 | 0.032 |
| I13                | 1.498               | 0.009 | 1.497               | 0.009 | 1.505                 | 0.100 |
| T14                | 1.427               | 0.008 | 1.433               | 0.008 | 1.476                 | 0.073 |
| L15                | 1.521               | 0.008 | 1.525               | 0.008 | 1.527                 | 0.069 |
| E16                | 1.316               | 0.013 | 1.314               | 0.011 | 1.241                 | 0.054 |

|     |       |       |       |       |       |       |
|-----|-------|-------|-------|-------|-------|-------|
| V17 | 1.495 | 0.008 | 1.497 | 0.009 | 1.650 | 0.113 |
| E18 | 1.368 | 0.008 | 1.367 | 0.008 | 1.341 | 0.076 |
| S20 | 1.450 | 0.009 | 1.454 | 0.008 | 1.473 | 0.056 |
| D21 | 1.607 | 0.009 | 1.614 | 0.008 | 1.560 | 0.077 |
| T22 | 1.521 | 0.008 | 1.515 | 0.007 | 1.593 | 0.028 |
| I23 | 1.589 | 0.009 | 1.611 | 0.010 | 1.719 | 0.060 |
| N25 | 1.568 | 0.008 | 1.557 | 0.006 | 1.621 | 0.078 |
| V26 | 1.581 | 0.010 | 1.580 | 0.011 | 1.502 | 0.144 |
| K27 | 1.560 | 0.008 | 1.559 | 0.008 | 1.694 | 0.098 |
| A28 | 1.592 | 0.008 | 1.594 | 0.007 | 1.685 | 0.074 |
| K29 | 1.517 | 0.008 | 1.516 | 0.007 | 1.582 | 0.090 |
| I30 | 1.544 | 0.008 | 1.546 | 0.008 | 1.674 | 0.071 |
| Q31 | 1.565 | 0.008 | 1.567 | 0.007 | 1.685 | 0.069 |
| D32 | 1.543 | 0.008 | 1.542 | 0.007 | 1.575 | 0.065 |
| K33 | 1.482 | 0.008 | 1.477 | 0.008 | 1.621 | 0.059 |
| E34 | 1.426 | 0.008 | 1.430 | 0.007 | 1.474 | 0.058 |
| G35 | 1.419 | 0.008 | 1.419 | 0.007 | 1.486 | 0.064 |
| I36 | 1.302 | 0.008 | 1.301 | 0.008 | 1.352 | 0.058 |
| D39 | 1.564 | 0.009 | 1.556 | 0.009 | 1.659 | 0.077 |
| Q40 | 1.490 | 0.008 | 1.485 | 0.008 | 1.523 | 0.067 |
| Q41 | 1.513 | 0.008 | 1.512 | 0.008 | 1.565 | 0.073 |
| R42 | 1.449 | 0.008 | 1.452 | 0.007 | 1.512 | 0.060 |
| L43 | 1.427 | 0.008 | 1.417 | 0.008 | 1.417 | 0.052 |
| I44 | 1.464 | 0.008 | 1.467 | 0.009 | 1.560 | 0.100 |
| F45 | 1.481 | 0.009 | 1.480 | 0.007 | 1.492 | 0.044 |
| A46 | 1.487 | 0.008 | 1.488 | 0.008 | 1.638 | 0.046 |
| G47 | 1.465 | 0.008 | 1.464 | 0.007 | 1.488 | 0.043 |
| K48 | 1.461 | 0.007 | 1.463 | 0.007 | 1.450 | 0.083 |
| Q49 | 1.427 | 0.009 | 1.424 | 0.007 | 1.447 | 0.057 |
| L50 | 1.530 | 0.008 | 1.532 | 0.007 | 1.618 | 0.058 |
| E51 | 1.361 | 0.007 | 1.363 | 0.009 | 1.442 | 0.053 |
| D52 | 1.304 | 0.007 | 1.302 | 0.007 | 1.399 | 0.059 |
| R54 | 1.429 | 0.007 | 1.430 | 0.008 | 1.596 | 0.101 |
| T55 | 1.498 | 0.008 | 1.495 | 0.007 | 1.570 | 0.053 |
| L56 | 1.601 | 0.008 | 1.608 | 0.009 | 1.718 | 0.110 |
| S57 | 1.548 | 0.007 | 1.551 | 0.006 | 1.608 | 0.059 |
| D58 | 1.636 | 0.008 | 1.656 | 0.009 | 1.812 | 0.057 |
| Y59 | 1.476 | 0.008 | 1.479 | 0.008 | 1.391 | 0.065 |
| N60 | 1.539 | 0.009 | 1.538 | 0.007 | 1.691 | 0.052 |
| I61 | 1.532 | 0.008 | 1.531 | 0.007 | 1.524 | 0.064 |
| Q62 | 1.344 | 0.007 | 1.340 | 0.007 | 1.388 | 0.029 |
| K63 | 1.396 | 0.007 | 1.403 | 0.008 | 1.472 | 0.054 |
| E64 | 1.552 | 0.008 | 1.553 | 0.008 | 1.602 | 0.049 |
| S65 | 1.541 | 0.008 | 1.537 | 0.007 | 1.670 | 0.080 |
| T66 | 1.426 | 0.008 | 1.432 | 0.007 | 1.424 | 0.067 |
| L67 | 1.488 | 0.008 | 1.487 | 0.008 | 1.618 | 0.050 |
| H68 | 1.435 | 0.008 | 1.434 | 0.007 | 1.532 | 0.036 |
| L69 | 1.487 | 0.009 | 1.494 | 0.008 | 1.502 | 0.060 |

|     |       |       |       |       |       |       |
|-----|-------|-------|-------|-------|-------|-------|
| V70 | 1.526 | 0.008 | 1.523 | 0.009 | 1.714 | 0.093 |
| L71 | 1.485 | 0.007 | 1.524 | 0.009 | 1.502 | 0.034 |
| R72 | 1.538 | 0.009 | 1.530 | 0.008 | 1.521 | 0.060 |
| L73 | 1.570 | 0.008 | 1.575 | 0.007 | 1.602 | 0.022 |
| R74 | 1.435 | 0.008 | 1.438 | 0.008 | 1.482 | 0.014 |
| G75 | 1.219 | 0.007 | 1.216 | 0.008 | 1.295 | 0.008 |
| G76 | 0.846 | 0.006 | 0.843 | 0.006 | 0.846 | 0.005 |

### Determination of *signal-to-noise ratio*

All processed NMR spectra were analyzed with SPARKY software. The '*lt*' command delivers list of the selected cross-peaks containing, besides other data, peak intensities and their signal-to noise ratios (*SNR*) often indispensable in quantitative studies. On the other hand, SPARKY program contains an option to provide root-mean-square noise (*RMSN*) calculated for manually selected region of a 2D spectrum applying '*rm*' command. The *SNR* values calculated using the *RMSN* data differ from those delivered by the '*lt*' command. The ratios  $SNR(lt)/SNR(rm)$  determined in measurements used in this work (71 values with an average equal to 1.26) are visualized with a histogram shown below. Generally,  $SNR(lt)$  are greater than  $SNR(rm)$  resulting in the underestimation of NOE errors,  $d\varepsilon$ . Hence, the use of NOE data in the protein dynamics evaluation becomes unreliable. The use of  $SNR(rm)$  option is strongly recommended in all studies requiring quantitative information.

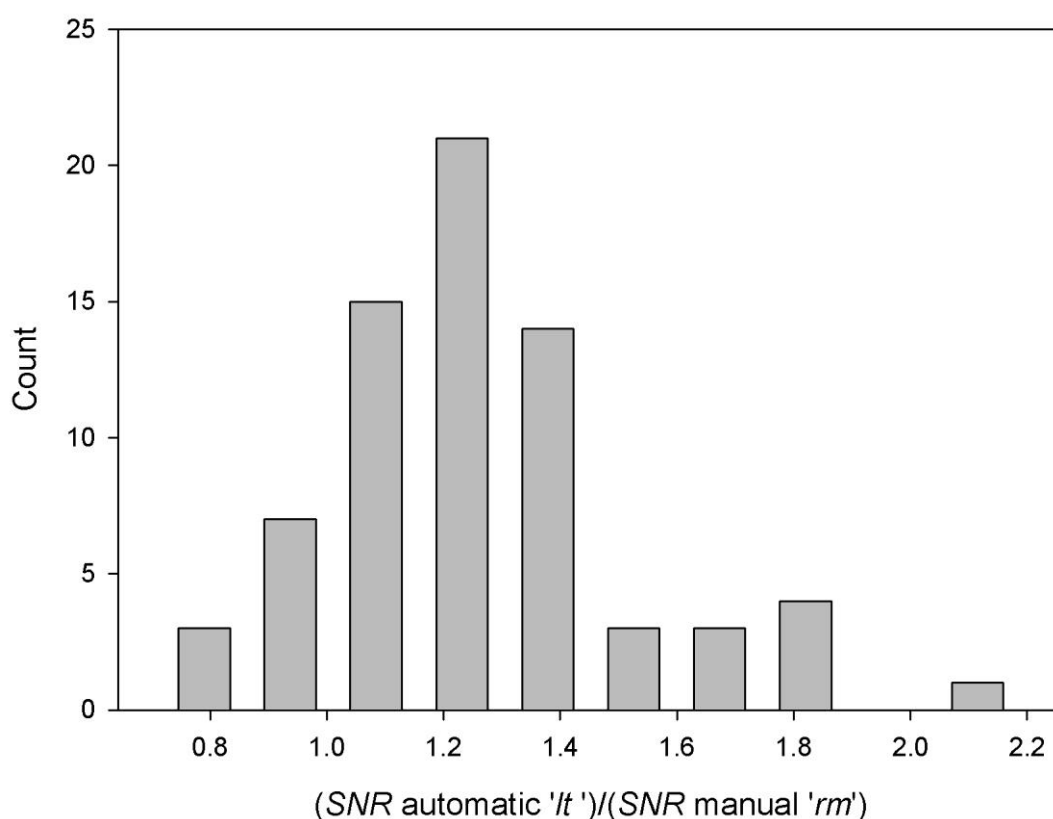



**Table S3**General data for NOE and  $R_1$  measurements presented and analyzed in the text.

| Exp                 | $B_0$ [T] | $RD_1$ [s] | $RD_2$ [s] | $D_{sat}$ [s]     | $T_{exp}$ [h] <sup>g)</sup> | $\langle SNR \rangle$ <sup>h)</sup> | $\exp(-RD_i \cdot R_{1w})$ |
|---------------------|-----------|------------|------------|-------------------|-----------------------------|-------------------------------------|----------------------------|
| DNOE                | 16.4      | 10.0       | 10.0       | set <sup>c)</sup> | 74.0/19.5                   | 405                                 | 0.020                      |
| DNOE                | 22.3      | 10.0       | 10.0       | set <sup>d)</sup> | 54.5/19.7                   | 791                                 | 0.016                      |
| ssNOE               | 18.8      | 14.0       | 0.0        | 4.0               | 8.1                         | 569                                 | 0.003                      |
| ssNOE               | 18.8      | 14.0       | 0.0        | 7.0               | 9.4                         | 617                                 | 0.003                      |
| ssNOE               | 18.8      | 14.0       | 0.0        | 14.0              | 12.5                        | 610                                 | 0.003                      |
| ssNOE               | 22.3      | 13.0       | 0.0        | 3.0               | 7.2                         | 681                                 | 0.005                      |
| ssNOE <sup>a)</sup> | 22.3      | 10.0       | 0.0        | 10.0              | 9.0                         | 624                                 | 0.016                      |
| ssNOE <sup>b)</sup> | 16.4      | 10.0       | 10.0       | 8.0               | 12.5                        | 405                                 | 0.020                      |
| ssNOE <sup>b)</sup> | 16.4      | 10.0       | 10.0       | 6.01              | 11.6                        | 405                                 | 0.020                      |
| ssNOE <sup>b)</sup> | 16.4      | 10.0       | 10.0       | 4.01              | 10.8                        | 405                                 | 0.020                      |
| ssNOE <sup>b)</sup> | 22.3      | 10.0       | 10.0       | 4.01              | 10.6                        | 791                                 | 0.016                      |
| ssNOE <sup>b)</sup> | 22.3      | 10.0       | 10.0       | 3.0               | 10.3                        | 791                                 | 0.016                      |
| ssNOE <sup>b)</sup> | 22.3      | 10.0       | 10.0       | 1.3               | 9.6                         | 791                                 | 0.016                      |
| ssNOE               | 22.3      | 6.0        | 0.0        | 3.0               | 4.1                         | 682                                 | 0.084                      |
| ssNOE               | 22.3      | 3.0        | 0.0        | 3.0               | 2.8                         | 638                                 | 0.290                      |
| $R_1$               | 16.4      | 4.0        | --         | set <sup>e)</sup> |                             |                                     | --                         |
| $R_1$               | 22.3      | 4.0        | --         | set <sup>f)</sup> |                             |                                     | --                         |

a) series of 10 separate measurements performed with identical spectrometer setup

b) ssNOE was determined using two spectra taken from DNOE measurement with  $D_{sat}=0$  for the reference measurement and  $D_{sat}$  value given in column 5.

c) set of thirteen  $D_{sat}$  values [0.00, 0.09, 0.18, 0.31, 0.44, 0.66, 1.06, 2.00, 2.51, 4.01, 6.01, 8.00, 10.00].

d) set of eleven  $D_{sat}$  values [0.00, 0.11, 0.22, 0.35, 0.55, 0.66, 0.79, 1.10, 1.30, 3.00, 4.01].

e) set of seventeen  $R_1$  evolution times [0.03, 0.03, 0.05, 0.08, 0.11, 0.15, 0.19, 0.25, 0.33, 0.44, 0.58, 0.77, 1.04, 1.45, 1.45, 1.90, 1.90].

f) set of seventeen  $R_1$  evolution times [0.01, 0.01, 0.02, 0.03, 0.07, 0.10, 0.14, 0.19, 0.29, 0.33, 0.40, 0.54, 0.71, 0.94, 1.27, 1.50, 1.80].

g) total experimental time reported in hours. For DNOE experiments first number corresponds to full measurement with redundant delays. The second number gives experimental time for the curtailed DNOE experiment composed of four  $D_{sat}$  values (see section "Setup and data processing of DNOE measurement" and Fig. 3).

h)  $SNR$  values averaged over 66 residues (Q2 - R72) determined for non-saturated ( $D_{sat}=0$ ) run.

### Figure S7

Correction of the  $H_N$  saturation period  $D_{sat}$ . Apparent NOE values,  $\varepsilon_{app}$ , determined in the experiment (10-10-1.3)/22.3 are noticeably larger than those in one of the most accurate measurement DNOE/22.3. Their differences  $\Delta\varepsilon = \varepsilon_{app} - \varepsilon$  are shown as red squares. Differences for three C-terminal residues are out of scale (0.088, 0.168, 0.419). Use of the correction described in the section Correction factors (Eq. 7), significantly diminished the difference (blue circles), on average from 0.037 (dashed red line) to 0.003 (dashed blue line).

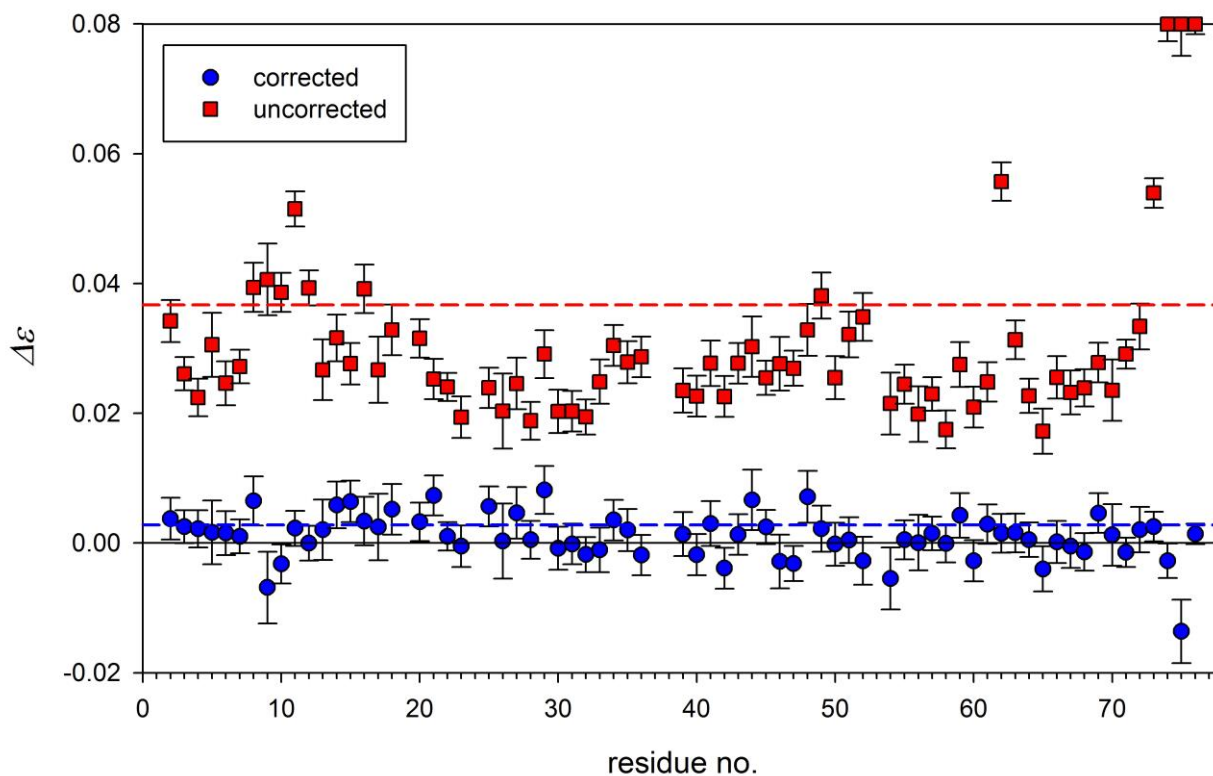

Supplement: 10858_2020_346_MOESM1_ESM.pdf [file 10858_2020_346_MOESM1_ESM.pdf]
